# Supplementary material for: The promoter effect of Co on the catalytic activity of the Cu oxide active phase supported on Al2O3 in the hydrogenolysis of glycerol
Source: Royal Society of Chemistry journal article supplement (doi:10.1039/c9nj03534f), 2019-01-01

## Supplementary information

**Figure S1:** UV-DRS spectra of Cu/Al<sub>2</sub>O<sub>3</sub> and Co(y)Cu/Al<sub>2</sub>O<sub>3</sub>oxide catalysts

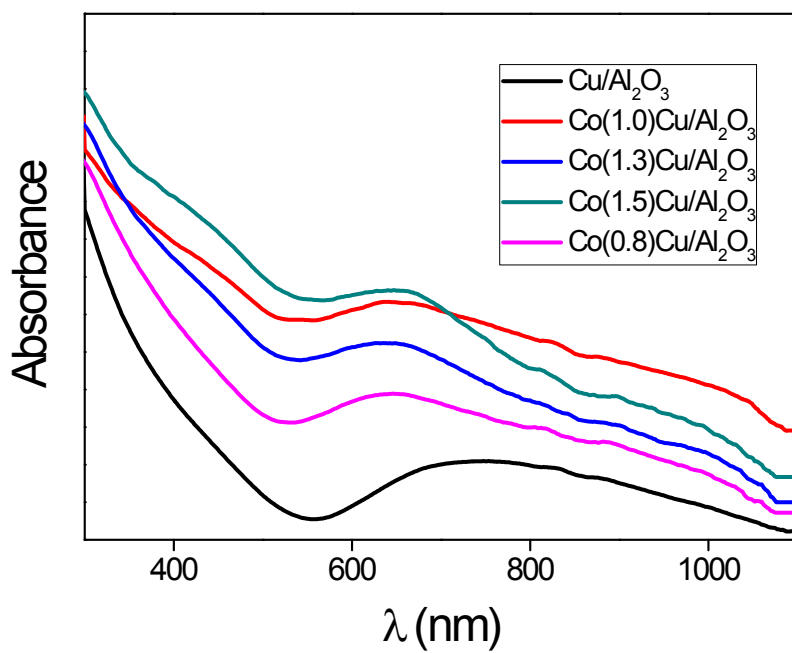

Supplement: c9nj03534f1.pdf [file c9nj03534f1.pdf]
